# Supplementary material for: Rapid Generation of Long Noncoding RNA Knockout Mice Using CRISPR/Cas9 Technology
Source: PubMed Central journal article supplement (PMC6468733; doi:10.3390/ncrna5010012), 2019-01-23
Supplement: ncrna-05-00012-s001.pdf [file ncrna-05-00012-s001.pdf]

**Supplementary Figures:**

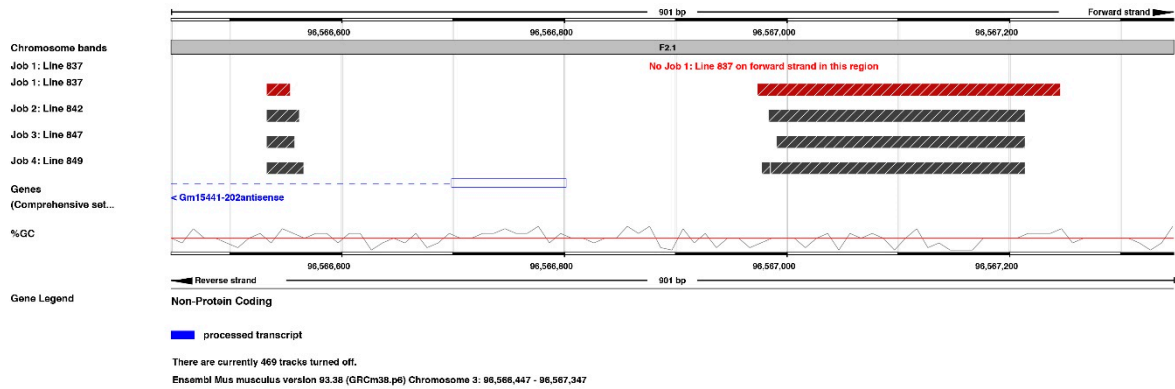

**Figure S1: Validated sgRNAs:**

Table of sgRNAs that have been evaluated for genome-editing activity, including the crRNA spacer sequence of the respective sgRNA and the outcome of the T7E1 assay. The length of the spacer sequences is indicated in brackets behind the name of the respective sgRNA.

**Inheritance of Allele *Gm15441*<sup>Δ1</sup> (Line 837)**

| Parental Genotypes | Number of Breedings | Total Offspring | Pups per Breeding | Males | Females | Δ/Δ (in %) | wt/Δ (in %) | wt/wt (in %) | χ <sup>2</sup> -Test (P = 0.05) |
|--------------------|---------------------|-----------------|-------------------|-------|---------|------------|-------------|--------------|---------------------------------|
| F0 X wt/wt         | 3                   | 29              | 9.66              | 13    | ---     | 0          | 23.07       | 76.93        | n.s.                            |
|                    |                     |                 |                   | ---   | 16      | 0          | 31.25       | 68.75        | n.s.                            |
| wt/Δ X wt/Δ        | 3                   | 24              | 8                 | 15    | ---     | 20         | 60          | 20           | n.s.                            |
|                    |                     |                 |                   | ---   | 9       | 11.11      | 55.55       | 33.33        | n.s.                            |
| wt/Δ X Δ/Δ         | 1                   | 4               | 4                 | 0     | ---     | 0          | 0           | 0            | n.s.                            |
|                    |                     |                 |                   | ---   | 4       | 50         | 50          | 0            | n.s.                            |

**Figure S2: Generated *Gm15441*-deficient mouse lines:**

Overview of Ensembl genome browser tracks depicting *Gm15441*<sup>Δ</sup> alleles generated by CRISPR/Cas9-mediated deletion of *Gm15441* exon 1. Error-prone NHEJ repair of Cas9-induced DSBs resulted in minor variations of truncated *Gm15441*<sup>Δ</sup> alleles in the four stable *Gm15441*<sup>Δ</sup> mouse lines (internal classifications as *Gm15441*<sup>Δ1</sup> [founder #1], *Gm15441*<sup>Δ6</sup> [founder #6], *Gm15441*<sup>Δ11</sup> [founder #11] and *Gm15441*<sup>Δ13</sup> [founder #13]). The deletion size

for the respective mouse lines is as follows: *Gm15441*<sup>Δ1</sup>, 420 bp; *Gm15441*<sup>Δ6</sup>, 422 bp; *Gm15441*<sup>Δ11</sup>, 433 bp; *Gm15441*<sup>Δ13</sup>, 411 bp. All mice of line *Gm15441*<sup>Δ13</sup> harbor an additional T->A base pair substitution at the 3' cutting site (chr3: 96,566,985).

| <u>Primer for T7 Endonuclease I Assays</u> | <u>Sequence (5' -&gt; 3')</u> |
|--------------------------------------------|-------------------------------|
| Gm15441-5'-1 (20) forward                  | GCTCCTACTCAGACCCCTTGTTTC      |
| Gm15441-5'-1 (20) reverse                  | CTCCCTGAGTTGCTTTTGGTC         |
| Gm15441-5'-2 (20) forward                  | GAAGGGAGATAAAGCGCACG          |
| Gm15441-5'-2 (20) reverse                  | ATGGGGAGCAAGCCGATAAG          |
| Gm15441-3'-1 (20) forward                  | GACTAGTCTGATGGAGGCATC         |
| Gm15441-3'-1 (20) reverse                  | TGTGTGTGTGTGTGAGAGAGAG        |
| Gm15441-3'-2 (20) forward                  | TCAGCCTGCTTTCTTATATGGC        |
| Gm15441-3'-2 (20) reverse                  | TGCAAACACAGACATGCACAC         |
| Gm15441-5'-1 (18) forward                  | GCGCACGTTTAACTGACTCTC         |
| Gm15441-5'-1 (18) reverse                  | ATAAGCAGCACCCCTCCATG          |
| Gm15441-5'-2 (18) forward                  | CACAGAAGGGAGATAAAGCGC         |
| Gm15441-5'-2 (18) reverse                  | TTGCCCTCCCTCACTGATGG          |
| Gm15441-3'-1 (18) forward                  | ATCAGTGAGGGAAGGCAAGG          |
| Gm15441-3'-1 (18) reverse                  | AGCAAGCCAGTATCACATGC          |
| Gm15441-3'-2 (18) forward                  | ATGGAGGGGTGCTGCTTATC          |
| Gm15441-3'-2 (18) reverse                  | GCAGGAAGGCTAACAGGAGG          |

*Figure S3: Inheritance of Allele Gm15441<sup>Δ</sup> (Line 837):*

Table depicting transgenerational inheritance of the truncated allele *Gm15441*<sup>Δ1</sup> in breedings of founder animals (F0) and their progeny. Statistical differences were calculated using chi-squared ( $\chi^2$ )-tests with significance level  $P=0.05$ .
